# Supplementary material for: Prehospital Partial Resuscitative Endovascular Balloon Occlusion of the Aorta for Exsanguinating Subdiaphragmatic Hemorrhage
Source: PubMed Central journal article supplement (PMC11238066; doi:10.1001/jamasurg.2024.2254), 2024-07-10
Supplement: jamasurg-e242254-s001.pdf [file jamasurg-e242254-s001.pdf]

## Supplemental Online Content

Lendrum RA, Perkins Z, Marsden M, et al. Prehospital partial resuscitative endovascular balloon occlusion of the aorta for exsanguinating subdiaphragmatic hemorrhage. *JAMA Surg*. Published online July 10, 2024. doi:10.1001/jamasurg.2024.2254

**eFigure 1. Individual Hemodynamic responses to Z1-REBOA and P-REBOA**

**eFigure 2. Kaplan-Meier Survival Estimates Z1 REBOA, P-REBOA and Resuscitative Thoracotomy**

**eTable 1. Technical Outcomes – Z1 REBOA Patients**

**eTable 2. Key Timings (minutes)**

This supplemental material has been provided by the authors to give readers additional information about their work.

**eFigure 1. Individual Hemodynamic responses to Z1-REBOA and P-REBOA**

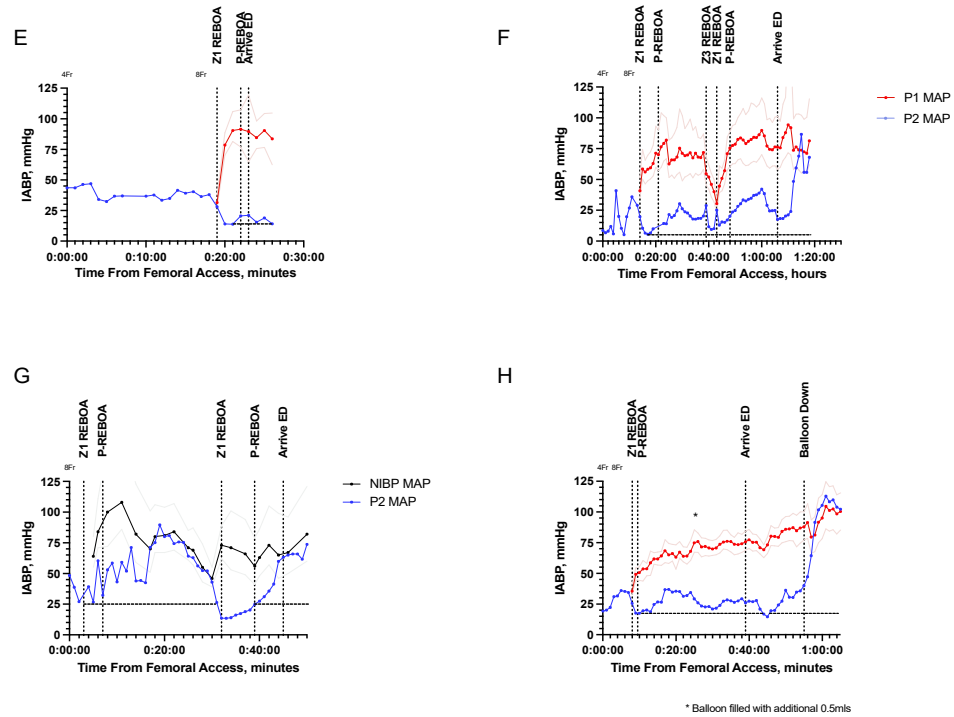

**Legend eFigure 1**

|          |                                                                       |
|----------|-----------------------------------------------------------------------|
| P1 MAP   | Proximal (aortic) mean arterial pressure measured tip REBOA catheter  |
| P2 MAP   | Distal mean arterial pressure measured side arm 8Fr access sheath CFA |
| NIBP MAP | Non-invasive blood pressure - mean arterial pressure                  |
| -----    | Post inflation distal mean arterial pressure                          |

|   |        |
|---|--------|
| E | Case 3 |
| F | Case 6 |
| G | Case 7 |
| H | Case 9 |

eFigure 2. Kaplan-Meier Survival Estimates Z1 REBOA, P-REBOA and Resuscitative Thoracotomy

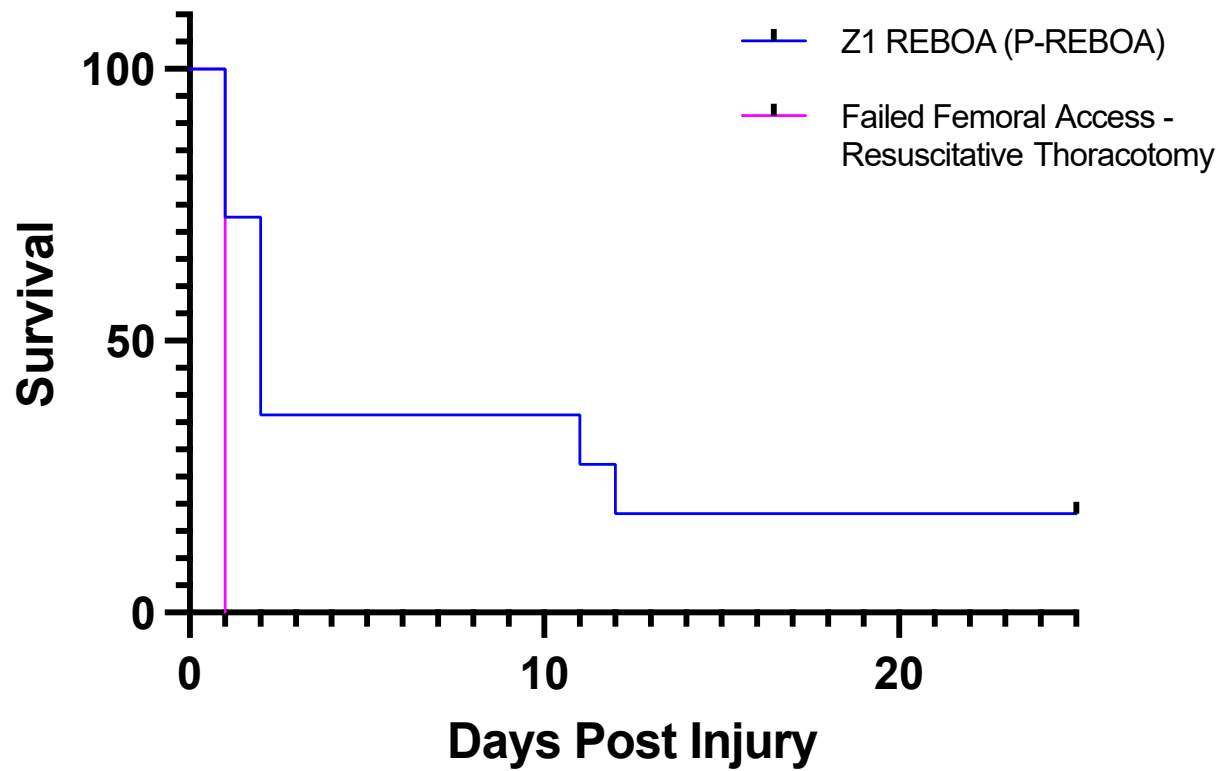

**eTable 1. Technical Outcomes – Z1 REBOA Patients**

| Case<br>(Sequential<br>order) | Catheter<br>insertion<br>depth<br>(cm) | Z1 REBOA                       |                                   |                             |                          | P-REBOA                                       |                           |                                 |                                         | Duration (min) |                     |                       |                 | Total<br>Duration<br>REBOA |
|-------------------------------|----------------------------------------|--------------------------------|-----------------------------------|-----------------------------|--------------------------|-----------------------------------------------|---------------------------|---------------------------------|-----------------------------------------|----------------|---------------------|-----------------------|-----------------|----------------------------|
|                               |                                        | Proximal<br>IABP<br>transduced | Balloon<br>inflation<br>(vol, ml) | Confirmed Z1<br>positioning | Repositioned<br>(Zone)   | Post<br>inflation D-<br>MAP mmHg<br>(C-REBOA) | Increase<br>D-MAP<br>mmHg | Return<br>distal<br>pulsatility | Pre-<br>hospital<br>P-REBOA<br>achieved | SP-<br>REBOA   | Z1 C-<br>REBOA      | Z1 P-<br>REBOA        | Z3<br>REBOA     |                            |
| 1(1)                          | 47                                     | Yes                            | 8                                 | Yes                         | No                       | 10                                            | 12                        | Yes                             | Yes                                     | No             | 19                  | 70 + 100 <sup>J</sup> | 0               | 189                        |
| 2 (2)                         | 45                                     | Yes <sup>1</sup>               | 8                                 | Yes <sup>a</sup>            | Yes (Z3) <sup>D</sup>    | 20                                            | 0                         | No                              | No                                      | N/A            | 79                  | N/A                   | 49              | 128                        |
| 3 (3)                         | 45                                     | Yes                            | 8                                 | N/I                         | Yes (Z3) <sup>D</sup>    | 13                                            | 10                        | Yes                             | Yes                                     | Yes            | 2                   | 35                    | 20              | 57                         |
| 4 (4)                         | 45                                     | Yes                            | 8                                 | No <sup>b</sup>             | Yes (Z3) <sup>E</sup>    | 7                                             | 14                        | Yes                             | Yes                                     | No             | 10                  | 5                     | 65 <sup>I</sup> | 80                         |
| 5 (9)                         | 45                                     | Yes                            | 8                                 | Yes                         | No                       | 15                                            | 10                        | Yes                             | Yes                                     | No             | 18                  | 102                   | 0               | 120                        |
| 6 (10)                        | 45                                     | Yes <sup>2</sup>               | 8                                 | Yes                         | Yes (Z3) <sup>E, F</sup> | 6                                             | 9                         | Yes                             | Yes                                     | No             | 10 + 5 <sup>F</sup> | 17 + 28 <sup>F</sup>  | 4               | 64                         |
| 7 (11)                        | 45                                     | No <sup>3,4</sup>              | 8                                 | Yes                         | No                       | 26                                            | 30                        | Yes                             | Yes                                     | Yes            | 4                   | 88                    | 0               | 92                         |
| 8 (12)                        | 45                                     | Yes <sup>5</sup>               | 8                                 | No <sup>c</sup>             | No                       | 8                                             | 0                         | No                              | No                                      | N/A            | 13 <sup>C</sup>     | N/A                   | 0               | 13                         |
| 9 (14)                        | 45                                     | Yes                            | 5                                 | Yes                         | No                       | 18 <sup>H</sup>                               | N/A <sup>H</sup>          | Yes <sup>H</sup>                | Yes <sup>H</sup>                        | Yes            | 0                   | 49                    | 0               | 49                         |
| 10 (15)                       | 45                                     | Yes <sup>1</sup>               | 8                                 | Yes <sup>a</sup>            | No                       | 13                                            | 0                         | No                              | No                                      | N/A            | 71                  | 77 <sup>k</sup>       | 0               | 148                        |
| 11 (16)                       | 45                                     | Yes                            | 5                                 | Yes                         | Yes (Z3) <sup>G</sup>    | 15                                            | 5                         | Yes                             | Yes                                     | Yes            | 9                   | 23                    | 35              | 67                         |

IABP – Intra-arterial blood pressure, N/I – Not imaged, D-MAP – Distal mean arterial pressure mmHg, P-REBOA – Partial REBOA, SP-REBOA – Spontaneous P-REBOA, N/A – Not applicable.

<sup>1</sup> Proximal IABP transduced post balloon inflation, monitoring setup issue (failed transducer “zero” therefore no numerical value recorded), <sup>2</sup> Prolonged blockage access sheath and therefore lack of distal pressure value, <sup>3</sup> multiple set-up issues transducer on REBOA catheter lumen proximal to balloon (balloon transducer 3-way tap open to air/atmospheric pressure, failure pressurization REBOA catheter flush line, ultimately failure of arterial transducer requiring replacement on hospital arrival, NIBP values substituted) <sup>4</sup> Inadvertent balloon 3-way tap displacement resulting in balloon deflation and hypotension, <sup>5</sup> Proximal IABP transduced post REBOA (transducer cable disconnection).

<sup>a</sup> Surgical palpation, <sup>b</sup> Repositioned – Z3 pre-hospital (peri-renal (Z2) on CT, <sup>c</sup> Pronounced Life Extinct on scene, device in situ, <sup>D</sup> Operating theatre, <sup>E</sup> Pre-hospital, <sup>F</sup> Repositioned Z1 due to hypotension, <sup>G</sup> Emergency Department, <sup>H</sup> Straight to P-REBOA, no period C-REBOA, distal pulsatility never lost, <sup>I</sup> 13 minutes Z3 C-REBOA + 52 minutes Z3 P-REBOA, <sup>J</sup> Second period Z1 P-REBOA during repeat DCS Laparotomy (approximate timings), <sup>k</sup> in-hospital P-REBOA, commenced in the ED (approximate timings) following titrated balloon deflation.

**eTable 2.** Key Timings (minutes)

| Case (Sequential order)               | Emergency call – REBOA | LAA arrival – REBOA | REBOA – P-REBOA | LAA Scene Time                                | Emergency call – Hospital Arrival               |
|---------------------------------------|------------------------|---------------------|-----------------|-----------------------------------------------|-------------------------------------------------|
| <b>REBOA</b>                          |                        |                     |                 |                                               |                                                 |
| 1 (1)                                 | 54                     | 10                  | 6               | 32                                            | 89                                              |
| 2(2)                                  | 67                     | 49                  | N/A             | 67                                            | 108                                             |
| 3(3)                                  | 74                     | 62                  | 2               | 49                                            | 72                                              |
| 4(4)                                  | 56                     | 31                  | 10              | 39                                            | 73                                              |
| 5(9)                                  | 53                     | 34                  | 18              | 41                                            | 86                                              |
| 6(10)                                 | 67                     | 38                  | 10              | 77                                            | 115                                             |
| 7(11)                                 | 54                     | 28                  | 4               | 56                                            | 93                                              |
| 8(12)                                 | 54                     | 30                  | N/A             | 59                                            | N/A                                             |
| 9(14)                                 | 57                     | 40                  | 0               | 55                                            | 82                                              |
| 10(15)                                | 74                     | 43                  | N/A             | 56                                            | 115                                             |
| 11(16)                                | 67                     | 54                  | 9               | 60                                            | 89                                              |
| <b>Failed femoral arterial access</b> |                        |                     |                 |                                               |                                                 |
| 12(5)                                 |                        |                     |                 | 47                                            | 84                                              |
| 13(6)                                 |                        |                     |                 | 48                                            | 85                                              |
| 14(13)                                |                        |                     |                 | 32                                            | 94                                              |
| <b>EFA only</b>                       |                        |                     |                 |                                               |                                                 |
| 15(7)                                 |                        |                     |                 | 71                                            | 111                                             |
| 16 (8)                                |                        |                     |                 | 50                                            | 96                                              |
| <b>Median (IQR)</b>                   | 57 (54-67)             | 38 (30-49)          | 8 (3-18)        | <b>Cohort 53 (43-60)<br/>REBOA 55 (47-67)</b> | <b>Cohort 89 (84-108)<br/>REBOA 89 (82-108)</b> |
