# Supplementary material for: Prehospital Partial Resuscitative Endovascular Balloon Occlusion of the Aorta for Exsanguinating Subdiaphragmatic Hemorrhage
Source: PubMed Central journal article supplement (PMC11238066; doi:10.1001/jamasurg.2024.2254), 2024-07-10
Supplement: jamasurg-e242254-s002.pdf [file jamasurg-e242254-s002.pdf]

## Data Sharing Statement

Lendrum. Prehospital Partial Resuscitative Endovascular Balloon Occlusion of the Aorta for Exsanguinating Subdiaphragmatic Hemorrhage. *JAMA Surg.* Published July 10, 2024.  
doi:10.1001/jamasurg.2024.2254

### Data

**Data available:** Yes

**Data types:** Deidentified participant data

**How to access data:** Data will be made available for sharing on request. How to access data: Requests for access should be addressed to the corresponding author and will be considered by the study team. [robert.lendrum@nhs.net](mailto:robert.lendrum@nhs.net)

**When available:** With publication

### Supporting Documents

**Document types:** Other (please specify)

**Additional Information:** Study Protocol

**How to access documents:** Requests for the protocol should be addressed to the corresponding author. [robert.lendrum@nhs.net](mailto:robert.lendrum@nhs.net)

**When available:** With publication

### Additional Information

**Who can access the data:** Researchers whose proposed use of the data has been approved.

**Types of analyses:** These will be considered by the study team.

**Mechanisms of data availability:** After approval of a proposal.
